# Supplementary material
Source: PubMed Central journal article supplement (PMC6526936)

Vehicle

GPR4 antagonist 13

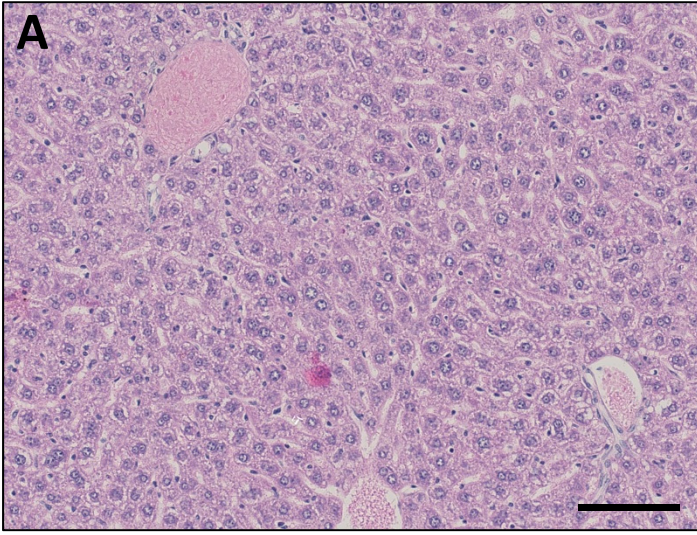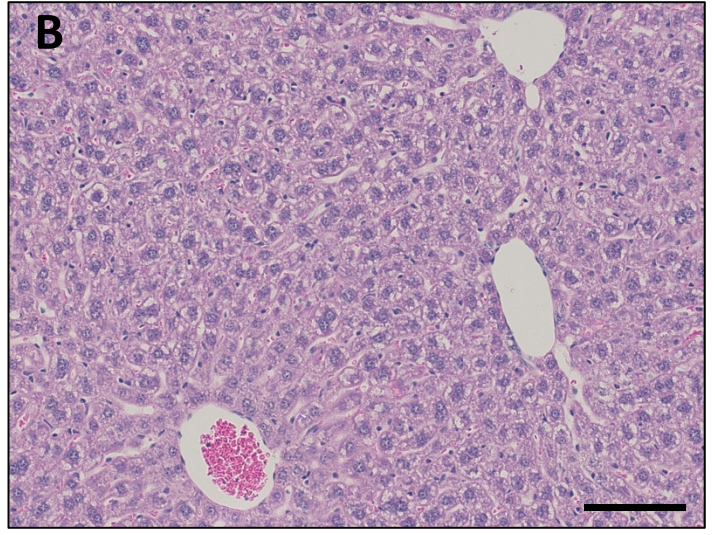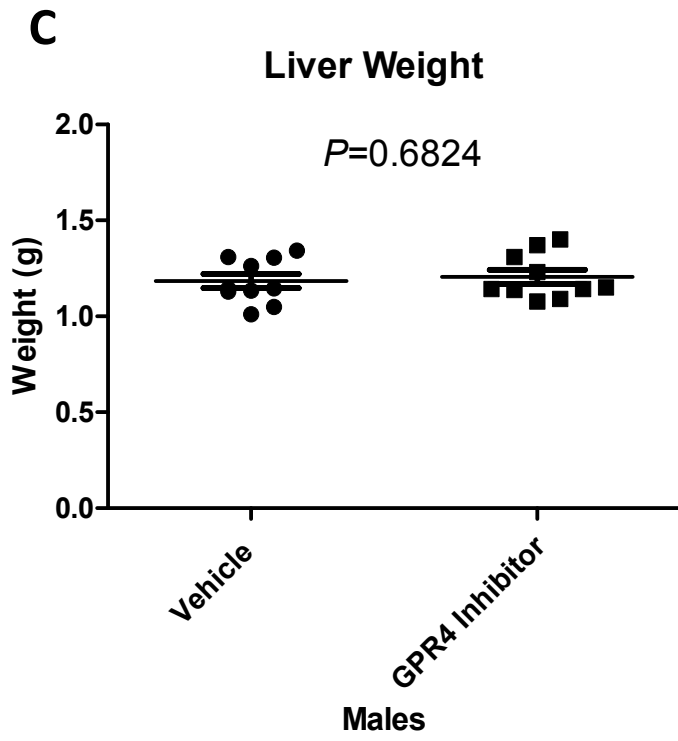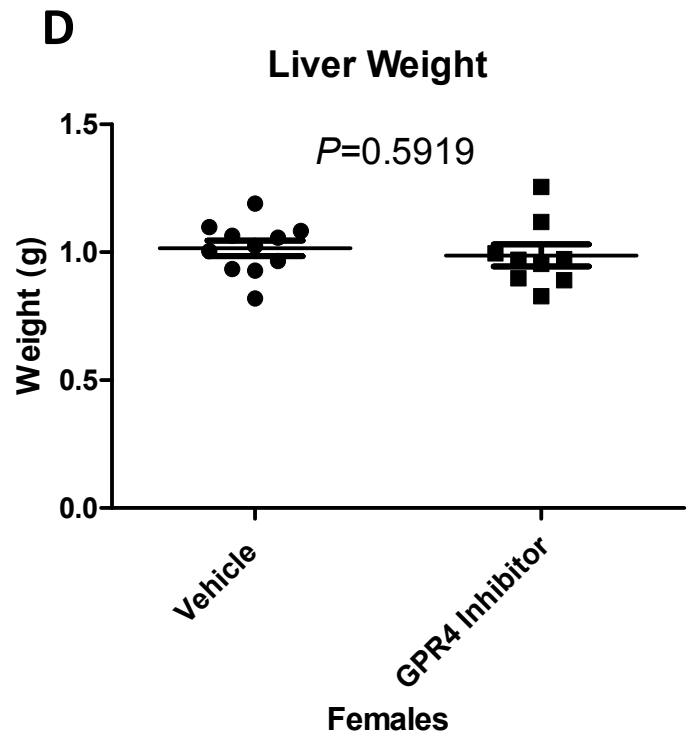

Supplement: NIHMS1525962-supplement-1.pdf [file NIHMS1525962-supplement-1.pdf]

**Vehicle**

**GPR4 antagonist 13**

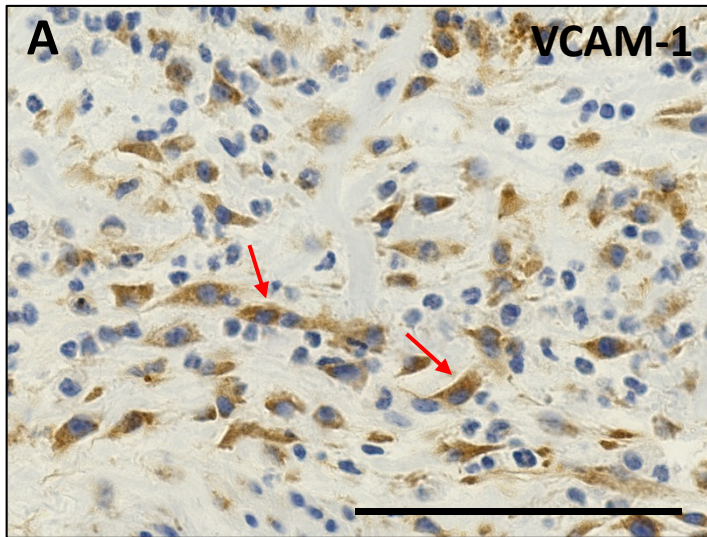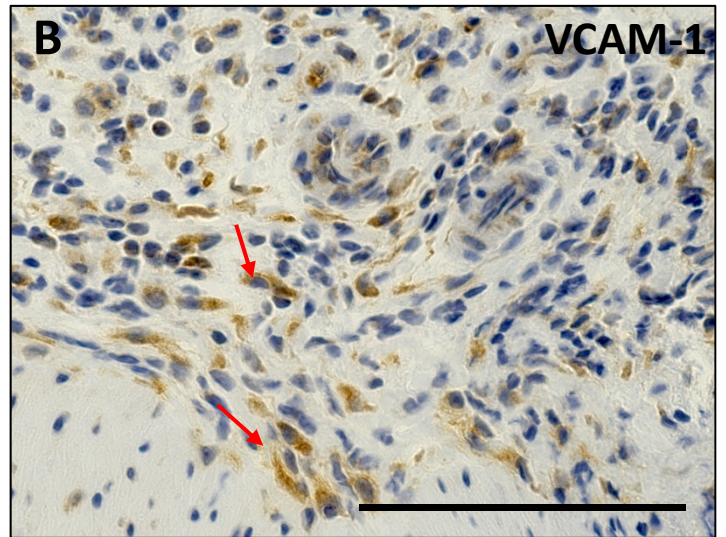

**Vehicle**

**GPR4 antagonist 13**

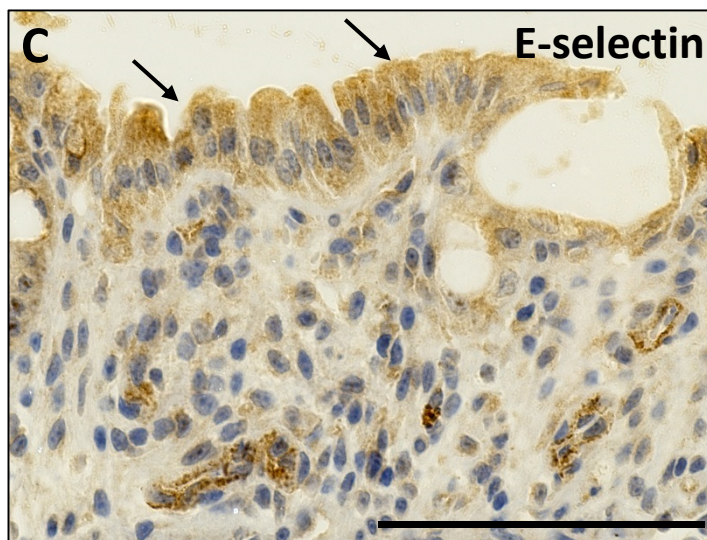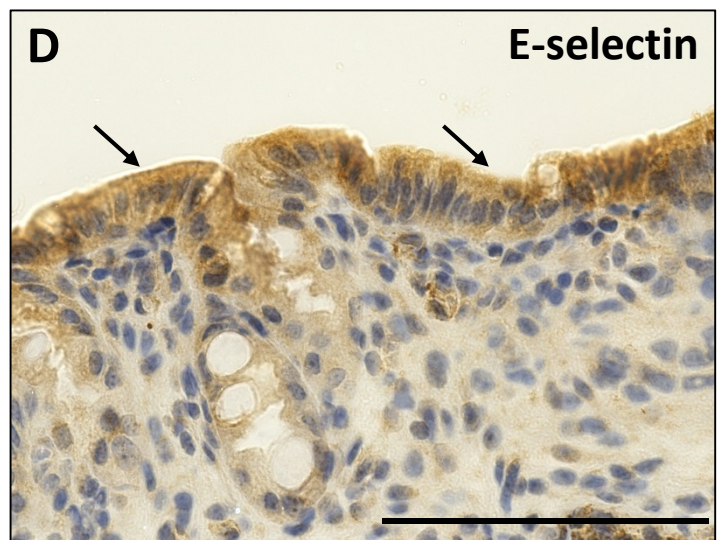

Supplement: NIHMS1525962-supplement-2.pdf [file NIHMS1525962-supplement-2.pdf]

**Vehicle**

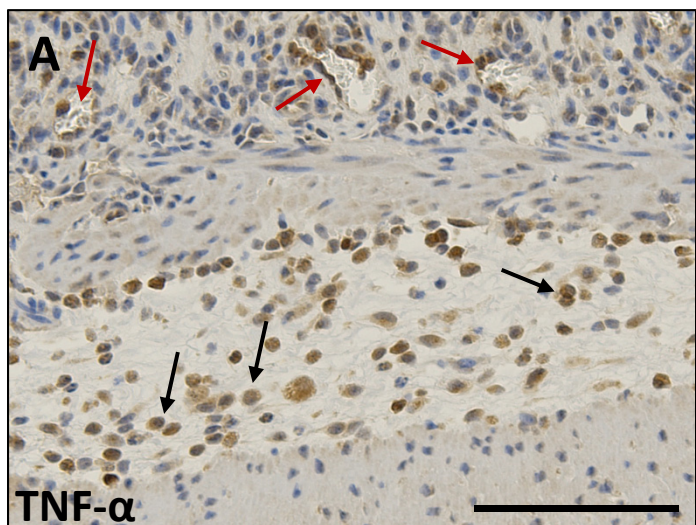

**GPR4 antagonist 13**

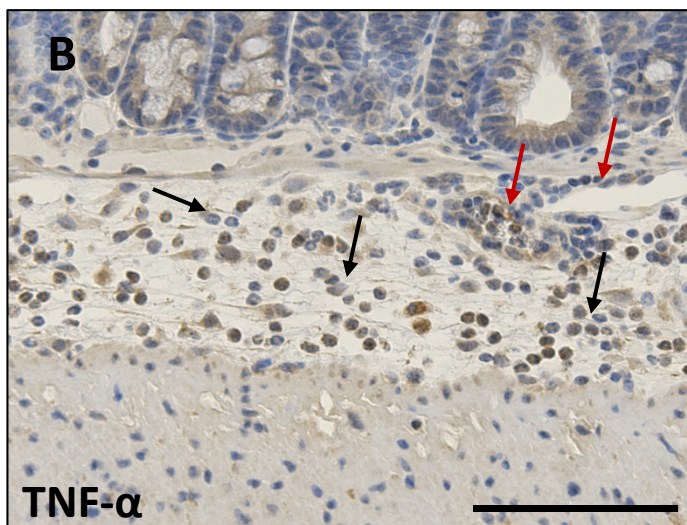

**Vehicle**

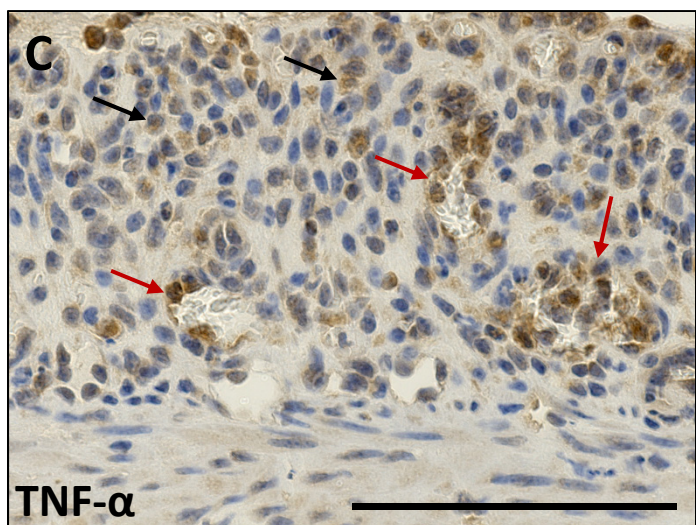

**GPR4 antagonist 13**

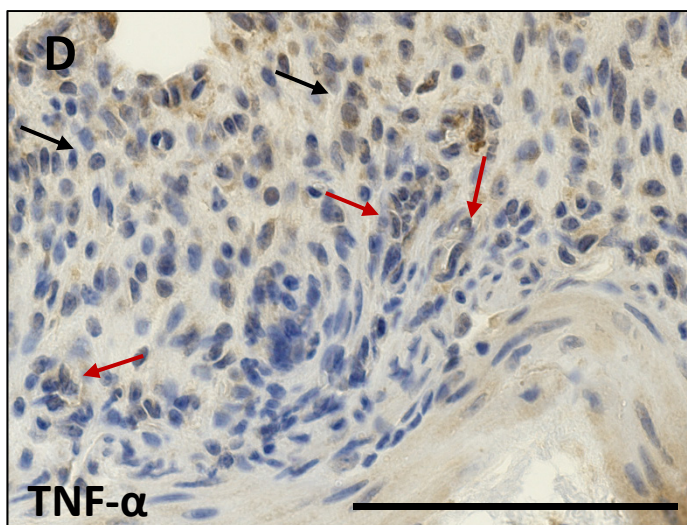

Supplement: NIHMS1525962-supplement-3.pdf [file NIHMS1525962-supplement-3.pdf]
